# Supplementary material for: Functional and molecular characterization of plant growth promoting Bacillus isolates from tomato rhizosphere
Source: PubMed Central journal article supplement — Heliyon. 2020 Aug 19;6(8):e04734. doi: 10.1016/j.heliyon.2020.e04734 (PMC7452486; doi:10.1016/j.heliyon.2020.e04734), 2020-08-19
Supplement: mmc1.pdf [file mmc1.pdf]

A

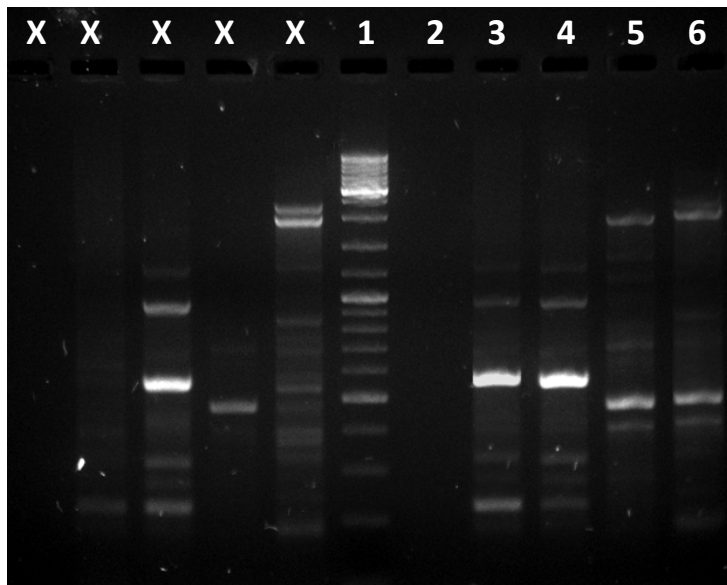

B

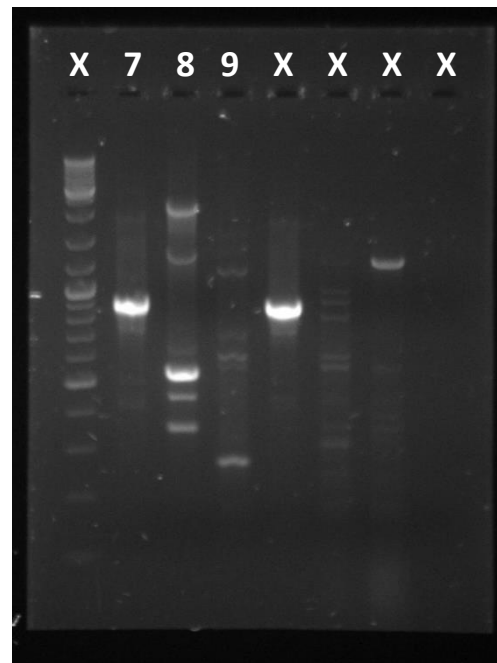

**Fig. S1. Full unedited gels for Fig. 1.** Gel A: Lane 1, DNA molecular mass standard (Generuler 2-Log DNA Ladder, NEB); lane 2, no DNA control (sterile water); lane 3, TRS-2; lane 4, TRS-4; lane 5, TRS-7; lane 6, TRS-8. Gel B: Lane 7, TRS-1; lane 8, TRS-3; lane 9, TRS-5. DNA molecular mass standard (Generuler 2-Log DNA Ladder, NEB) was used as DNA ladder in gel B (first lane from left). Lanes marked as 'X' in both the gels (A, B) were not included in the final figure (Fig.1).
